# Supplementary material for: The San Diego 2007 wildfires and Medi-Cal emergency department presentations, inpatient hospitalizations, and outpatient visits: An observational study of smoke exposure periods and a bidirectional case-crossover analysis
Source: PLoS Med. 2018 Jul 10;15(7):e1002601. doi: 10.1371/journal.pmed.1002601 (PMC6038982; doi:10.1371/journal.pmed.1002601)
Supplement: S1 Data — PM2.5, fine inhalable particles that are 2.5 micrometers and smaller. (XLSX) [file pmed.1002601.s004.xlsx]

## Sheet: zipPMspread
zipcode	2007-07-11	2007-07-12	2007-07-13	2007-07-14	2007-07-15	2007-07-16	2007-07-17	2007-07-18	2007-07-19	2007-07-20	2007-07-21	2007-07-22	2007-07-23	2007-07-24	2007-07-25	2007-07-26	2007-07-27	2007-07-28	2007-07-29	2007-07-30	2007-07-31	2007-08-01	2007-08-02	2007-08-03	2007-08-04	2007-08-05	2007-08-06	2007-08-07	2007-08-08	2007-08-09	2007-08-10	2007-08-11	2007-08-12	2007-08-13	2007-08-14	2007-08-15	2007-08-16	2007-08-17	2007-08-18	2007-08-19	2007-08-20	2007-08-21	2007-08-22	2007-08-23	2007-08-24	2007-08-25	2007-08-26	2007-08-27	2007-08-28
91901	0.17	0.1	0.02	1.22	2.14	0.15	0.91	0.07	0	0.07	0.02	0.05	0.02	0	0	0	0	0	0	1.03	0.45	1.21	0.93	0.15	0.05	0.28	0.23	0	0.02	0.02	0.02	0.01	0.07	0.19	0.05	0	0	0	0	0	0	0	0	0	0	0	0	0	0
91902	0.14	0.02	0.1	4.49	3.49	0.95	2.97	0.08	0	0.02	0.1	0.04	0.05	0	0	0	0	0	0	0.98	0.36	1.17	0.69	0.24	0	0.02	0.1	0.02	0.03	0.05	0.05	0.03	0.19	0.35	0.1	0	0	0	0	0	0	0	0	0	0	0	0	0	0
91905	0.03	0.02	0.01	0.22	0.53	0.19	0.54	0.03	0.01	0.19	0	0	0	0	0	0	0	0	0	0.95	0.43	0.21	0.07	0.12	0.33	0.35	0.38	0.19	0.08	0.02	0.01	0.01	0	0.02	0.01	0	0	0	0	0	0	0	0	0	0	0	0	0	0
91906	0.06	0.03	0.01	0.38	1.1	0.16	0.57	0.04	0	0.1	0.01	0.02	0.01	0	0	0	0	0	0	0.81	0.38	0.22	0.2	0.1	0.17	0.18	0.2	0.03	0.01	0.02	0.01	0	0.03	0.09	0.02	0	0	0	0	0	0	0	0	0	0	0	0	0	0
91910	0.15	0.01	0.11	5.26	3.44	1.4	3.26	0.09	0.01	0.01	0.09	0.03	0.05	0	0	0	0	0	0	0.96	0.33	0.22	0.36	0.15	0	0.02	0.09	0.02	0.05	0.07	0.06	0.04	0.26	0.4	0.13	0	0	0	0	0	0	0	0	0	0	0	0	0	0
91911	0.15	0	0.12	5.27	3.41	1.42	3.07	0.09	0.01	0.01	0.07	0.03	0.05	0	0	0	0	0	0	0.92	0.31	0.16	0.28	0.12	0	0.02	0.09	0.02	0.05	0.07	0.06	0.04	0.24	0.43	0.13	0	0	0	0	0	0	0	0	0	0	0	0	0	0
91913	0.13	0.01	0.09	4.21	3.41	0.93	2.56	0.07	0	0.01	0.08	0.05	0.05	0	0	0	0	0	0	0.9	0.32	0.33	0.56	0.24	0	0.02	0.09	0.02	0.04	0.05	0.05	0.03	0.15	0.37	0.11	0	0	0	0	0	0	0	0	0	0	0	0	0	0
91914	0.12	0.02	0.07	3.88	3.35	0.72	2.37	0.07	0	0.02	0.08	0.09	0.05	0	0	0	0	0	0	0.9	0.35	0.69	0.77	0.27	0	0.02	0.1	0.02	0.03	0.04	0.04	0.03	0.12	0.3	0.1	0	0	0	0	0	0	0	0	0	0	0	0	0	0
91915	0.13	0.01	0.07	4	3.4	0.85	2.3	0.07	0	0.02	0.08	0.07	0.05	0	0	0	0	0	0	0.86	0.31	0.25	0.52	0.24	0	0.02	0.09	0.02	0.04	0.04	0.04	0.03	0.12	0.35	0.11	0	0	0	0	0	0	0	0	0	0	0	0	0	0
91916	0.16	0.2	0.02	0.56	1.49	0.19	0.59	0.15	0.01	0.14	0.01	0.01	0.01	0	0	0	0	0	0	1.38	0.52	0.47	0.4	0.15	0.12	0.54	0.38	0.02	0.02	0.02	0.02	0.01	0.05	0.13	0.02	0	0	0	0	0	0	0	0	0	0	0	0	0	0
91917	0.07	0.01	0.03	2.31	2.7	0.15	1.28	0.04	0	0.02	0.08	0.14	0.04	0	0	0	0	0	0	0.72	0.31	0.21	0.48	0.22	0	0.02	0.1	0.01	0.02	0.02	0.02	0.01	0.08	0.24	0.07	0	0	0	0	0	0	0	0	0	0	0	0	0	0
91932	0.14	0	0.15	5.85	3.21	1.81	3.46	0.09	0.01	0	0.06	0.03	0.07	0	0	0	0	0	0	0.93	0.29	0.12	0.11	0.05	0	0.02	0.06	0.02	0.06	0.08	0.06	0.04	0.35	0.42	0.18	0	0	0	0	0	0	0	0	0	0	0	0	0	0
91934	0.02	0.01	0.01	0.17	0.44	0.18	0.54	0.02	0	0.18	0	0	0	0	0	0	0	0	0	0.78	0.4	0.13	0.04	0.08	0.38	0.22	0.33	0.25	0.06	0.02	0	0	0	0.02	0	0	0	0	0	0	0	0	0	0	0	0	0	0	0
91935	0.1	0.03	0.04	2.4	2.74	0.19	1.5	0.05	0	0.03	0.05	0.12	0.04	0	0	0	0	0	0	0.84	0.36	3.61	1.78	0.26	0.01	0.07	0.14	0.01	0.02	0.03	0.03	0.02	0.08	0.24	0.07	0	0	0	0	0	0	0	0	0	0	0	0	0	0
91941	0.13	0.07	0.08	4.3	3.4	0.55	3.02	0.08	0	0.02	0.18	0.05	0.04	0	0	0	0	0	0	1.09	0.44	8.33	1.43	0.24	0	0.07	0.14	0.02	0.03	0.05	0.06	0.04	0.18	0.32	0.09	0	0	0	0	0	0	0	0	0	0	0	0	0	0
91942	0.14	0.09	0.08	4.43	3.37	0.48	3.03	0.08	0	0.02	0.2	0.05	0.05	0	0	0	0	0	0	1.13	0.47	8.15	2.17	0.21	0	0.1	0.15	0.02	0.03	0.06	0.06	0.04	0.21	0.32	0.1	0	0	0	0	0	0	0	0	0	0	0	0	0	0
91945	0.16	0.04	0.1	4.63	3.5	0.77	3.17	0.09	0	0.02	0.15	0.04	0.05	0	0	0	0	0	0	1.07	0.42	2.08	0.87	0.22	0	0.04	0.11	0.02	0.03	0.06	0.06	0.04	0.22	0.33	0.1	0	0	0	0	0	0	0	0	0	0	0	0	0	0
91950	0.17	0.01	0.12	5.66	3.52	1.51	3.67	0.1	0	0.01	0.1	0.02	0.05	0	0	0	0	0	0	1.04	0.36	0.26	0.36	0.12	0	0.02	0.09	0.02	0.05	0.08	0.07	0.04	0.34	0.36	0.14	0	0	0	0	0	0	0	0	0	0	0	0	0	0
91962	0.07	0.07	0.02	0.25	0.78	0.19	0.54	0.06	0.01	0.17	0	0.01	0	0	0	0	0	0	0	1.08	0.46	0.24	0.16	0.14	0.22	0.44	0.37	0.07	0.02	0.02	0.01	0.01	0.01	0.05	0.01	0	0	0	0	0	0	0	0	0	0	0	0	0	0
91963	0.05	0.02	0.02	0.68	1.64	0.13	0.69	0.03	0	0.05	0.03	0.07	0.02	0	0	0	0	0	0	0.7	0.34	0.21	0.21	0.11	0.08	0.07	0.12	0.01	0.01	0.02	0.01	0	0.04	0.13	0.02	0	0	0	0	0	0	0	0	0	0	0	0	0	0
91977	0.12	0.04	0.08	4.29	3.42	0.66	2.97	0.08	0	0.02	0.14	0.06	0.04	0	0	0	0	0	0	1.04	0.41	5.79	1.11	0.26	0	0.05	0.12	0.02	0.03	0.05	0.06	0.03	0.17	0.32	0.09	0	0	0	0	0	0	0	0	0	0	0	0	0	0
91978	0.11	0.04	0.06	3.69	3.26	0.49	2.51	0.07	0	0.02	0.07	0.1	0.04	0	0	0	0	0	0	0.97	0.38	10.76	1.53	0.28	0	0.04	0.12	0.02	0.02	0.04	0.04	0.03	0.1	0.28	0.09	0	0	0	0	0	0	0	0	0	0	0	0	0	0
91980	0.05	0.01	0.01	1.03	1.95	0.12	0.76	0.03	0	0.03	0.06	0.09	0.02	0	0	0	0	0	0	0.66	0.3	0.2	0.2	0.1	0.06	0.02	0.09	0.01	0.02	0.02	0.01	0.01	0.05	0.16	0.03	0	0	0	0	0	0	0	0	0	0	0	0	0	0
92003	0.19	0	0.14	3.11	2.3	0.15	0.03	0.1	0.03	0.03	0	0.09	0	0	0	0	0	0	0	1.12	0.7	0.38	0.03	0.07	0.04	0.96	0.34	0.15	0.03	0.05	0.03	0.1	0.56	0.13	0.11	0	0	0	0	0	0	0	0	0	0	0	0	0	0
92004	0.04	0.04	0.09	0.26	0.53	0.36	0.33	0.04	0.09	0.48	0.01	0	0	0	0	0	0	0	0	0.59	0.52	0.19	0.02	0.35	0.29	0.84	0.72	0.29	0.08	0.03	0.06	0.07	0.01	0.02	0.23	0	0	0	0	0	0	0	0	0	0	0	0	0	0
92007	0.19	0.01	0.18	6.51	2.64	0.08	0.24	0.08	0.02	0.01	0.46	0.06	0.03	0	0	0	0	0	0	1.08	0.78	0.3	0.06	0.03	0	0.39	0.15	0.05	0.07	0.16	0.05	0.1	1.23	0.17	0.2	0	0	0	0	0	0	0	0	0	0	0	0	0	0
92008	0.2	0	0.2	6.09	2.39	0.1	0.09	0.12	0.03	0.01	0.35	0.09	0.01	0	0	0	0	0	0	1.15	0.75	0.37	0.04	0.03	0.02	0.69	0.18	0.1	0.07	0.14	0.03	0.11	1.31	0.19	0.13	0	0	0	0	0	0	0	0	0	0	0	0	0	0
92009	0.2	0.01	0.16	5.55	2.62	0.1	0.1	0.11	0.03	0.02	0.36	0.1	0.01	0	0	0	0	0	0	1.11	0.76	0.33	0.06	0.03	0	0.62	0.2	0.08	0.05	0.11	0.04	0.1	0.95	0.16	0.12	0	0	0	0	0	0	0	0	0	0	0	0	0	0
92010	0.2	0	0.19	5.48	2.45	0.11	0.07	0.12	0.03	0.02	0.33	0.15	0.01	0	0	0	0	0	0	1.18	0.74	0.36	0.05	0.03	0.02	0.73	0.21	0.1	0.06	0.11	0.03	0.11	1.05	0.17	0.12	0	0	0	0	0	0	0	0	0	0	0	0	0	0
92011	0.2	0	0.19	6.01	2.53	0.09	0.1	0.11	0.03	0.02	0.38	0.07	0.01	0	0	0	0	0	0	1.11	0.76	0.34	0.05	0.03	0	0.62	0.18	0.09	0.07	0.13	0.03	0.11	1.18	0.17	0.14	0	0	0	0	0	0	0	0	0	0	0	0	0	0
92014	0.22	0.06	0.15	6.17	2.87	0.09	0.49	0.07	0.02	0.01	0.44	0.06	0.03	0	0	0	0	0	0	1.1	0.75	0.27	0.1	0.03	0	0.35	0.16	0.05	0.06	0.13	0.06	0.09	0.92	0.16	0.17	0	0	0	0	0	0	0	0	0	0	0	0	0	0
92019	0.17	0.08	0.05	2.96	2.96	0.16	2.01	0.07	0	0.03	0.08	0.08	0.04	0	0	0	0	0	0	1.04	0.45	12.12	2.29	0.27	0	0.14	0.17	0.01	0.02	0.03	0.04	0.02	0.09	0.26	0.08	0	0	0	0	0	0	0	0	0	0	0	0	0	0
92020	0.17	0.11	0.07	3.97	3.24	0.29	2.58	0.08	0	0.02	0.18	0.06	0.05	0	0	0	0	0	0	1.1	0.49	15.35	2.45	0.23	0	0.13	0.17	0.02	0.03	0.05	0.06	0.04	0.16	0.32	0.09	0	0	0	0	0	0	0	0	0	0	0	0	0	0
92021	0.27	0.12	0.04	2.66	2.82	0.13	1.58	0.07	0	0.03	0.07	0.05	0.03	0	0	0	0	0	0	1.12	0.5	6.81	1.81	0.19	0.01	0.25	0.21	0.01	0.02	0.03	0.04	0.02	0.09	0.25	0.08	0	0	0	0	0	0	0	0	0	0	0	0	0	0
92024	0.2	0.01	0.17	6.03	2.64	0.09	0.15	0.1	0.03	0.02	0.39	0.08	0.02	0	0	0	0	0	0	1.11	0.78	0.31	0.06	0.03	0	0.51	0.18	0.07	0.06	0.13	0.04	0.1	1.06	0.16	0.14	0	0	0	0	0	0	0	0	0	0	0	0	0	0
92025	0.16	0.07	0.08	2.87	2.56	0.13	0.19	0.11	0.03	0.04	0.01	0.12	0.01	0	0	0	0	0	0	1.1	0.68	0.27	0.13	0.05	0.01	0.69	0.32	0.08	0.03	0.04	0.04	0.06	0.25	0.15	0.07	0	0	0	0	0	0	0	0	0	0	0	0	0	0
92026	0.18	0.01	0.12	2.8	2.4	0.15	0.06	0.09	0.03	0.03	0	0.1	0.01	0	0	0	0	0	0	1.09	0.69	0.33	0.05	0.06	0.01	0.87	0.36	0.15	0.03	0.04	0.03	0.08	0.38	0.12	0.1	0	0	0	0	0	0	0	0	0	0	0	0	0	0
92027	0.12	0.04	0.08	2.12	2.37	0.15	0.16	0.11	0.03	0.05	0	0.09	0.01	0	0	0	0	0	0	1.07	0.66	0.24	0.1	0.06	0.01	0.77	0.36	0.11	0.02	0.03	0.04	0.05	0.2	0.16	0.07	0	0	0	0	0	0	0	0	0	0	0	0	0	0
92028	0.18	0	0.18	2.69	1.89	0.2	0.04	0.06	0.03	0.03	0.01	0.05	0	0	0	0	0	0	0	1.05	0.73	0.46	0.07	0.13	0.07	1.1	0.32	0.16	0.05	0.08	0.04	0.13	0.52	0.16	0.09	0	0	0	0	0	0	0	0	0	0	0	0	0	0
92029	0.17	0.04	0.12	4.3	2.7	0.11	0.15	0.09	0.03	0.02	0.14	0.16	0.01	0	0	0	0	0	0	1.13	0.73	0.25	0.1	0.04	0	0.63	0.26	0.07	0.04	0.06	0.04	0.09	0.48	0.13	0.1	0	0	0	0	0	0	0	0	0	0	0	0	0	0
92036	0.06	0.06	0.02	0.21	0.69	0.24	0.47	0.06	0.02	0.26	0	0	0	0	0	0	0	0	0	1	0.52	0.25	0.1	0.2	0.2	0.63	0.6	0.22	0.09	0.02	0.02	0.02	0.02	0.03	0.06	0	0	0	0	0	0	0	0	0	0	0	0	0	0
92037	0.22	0.03	0.17	7.14	2.87	0.39	1.82	0.08	0	0	0.3	0.03	0.06	0	0	0	0	0	0	1.2	0.62	0.26	0.09	0.03	0	0.14	0.09	0.03	0.08	0.15	0.08	0.07	1.07	0.21	0.2	0	0	0	0	0	0	0	0	0	0	0	0	0	0
92040	0.36	0.26	0.04	2.32	2.67	0.13	1.11	0.15	0.01	0.04	0.06	0.08	0.03	0	0	0	0	0	0	1.18	0.57	2.6	1.05	0.12	0.02	0.41	0.26	0.01	0.02	0.03	0.04	0.03	0.1	0.23	0.08	0	0	0	0	0	0	0	0	0	0	0	0	0	0
92054	0.2	0	0.2	5.51	2.22	0.12	0.06	0.12	0.01	0.01	0.15	0.14	0.01	0	0	0	0	0	0	1.23	0.76	0.41	0.04	0.05	0.08	0.85	0.21	0.14	0.06	0.12	0.04	0.13	1.21	0.22	0.13	0	0	0	0	0	0	0	0	0	0	0	0	0	0
92055	0.2	0	0.23	4.59	1.84	0.18	0.05	0.1	0.02	0.01	0.05	0.08	0	0	0	0	0	0	0	1.14	0.8	0.49	0.09	0.1	0.11	1.02	0.23	0.31	0.09	0.12	0.04	0.17	0.91	0.23	0.14	0	0	0	0	0	0	0	0	0	0	0	0	0	0
92056	0.2	0	0.18	5.11	2.39	0.12	0.05	0.13	0.03	0.02	0.23	0.21	0.01	0	0	0	0	0	0	1.19	0.74	0.37	0.04	0.04	0.05	0.81	0.24	0.12	0.05	0.1	0.03	0.12	0.98	0.19	0.12	0	0	0	0	0	0	0	0	0	0	0	0	0	0
92057	0.2	0	0.18	4.62	2.32	0.13	0.04	0.12	0.03	0.02	0.11	0.15	0	0	0	0	0	0	0	1.17	0.74	0.4	0.04	0.05	0.07	0.9	0.27	0.13	0.05	0.08	0.04	0.12	0.86	0.19	0.12	0	0	0	0	0	0	0	0	0	0	0	0	0	0
92059	0.15	0	0.08	0.79	1.63	0.22	0.13	0.03	0.03	0.11	0	0.02	0	0	0	0	0	0	0	0.89	0.61	0.28	0.02	0.16	0.04	1.05	0.48	0.18	0.01	0.03	0.03	0.03	0.14	0.07	0.1	0	0	0	0	0	0	0	0	0	0	0	0	0	0
92061	0.14	0.01	0.07	0.76	1.75	0.22	0.22	0.03	0.02	0.1	0	0.01	0	0	0	0	0	0	0	0.93	0.61	0.26	0.03	0.13	0.04	0.96	0.5	0.17	0.01	0.02	0.04	0.02	0.13	0.06	0.08	0	0	0	0	0	0	0	0	0	0	0	0	0	0
92064	0.57	0.58	0.07	3.54	2.89	0.12	0.79	0.06	0.02	0.03	0.05	0.12	0.03	0	0	0	0	0	0	1.16	0.66	0.61	0.32	0.06	0	0.46	0.25	0.05	0.03	0.04	0.06	0.06	0.24	0.24	0.09	0	0	0	0	0	0	0	0	0	0	0	0	0	0
92065	0.22	0.15	0.05	1.52	2.2	0.17	0.47	0.23	0.01	0.08	0.01	0.06	0.01	0	0	0	0	0	0	1.17	0.64	0.53	0.26	0.09	0.04	0.64	0.37	0.04	0.03	0.02	0.04	0.03	0.1	0.19	0.05	0	0	0	0	0	0	0	0	0	0	0	0	0	0
92066	0.05	0.02	0.04	0.22	0.67	0.31	0.33	0.05	0.05	0.26	0.01	0	0	0	0	0	0	0	0	0.59	0.58	0.17	0.03	0.28	0.19	0.89	0.61	0.13	0.02	0.02	0.06	0.07	0.02	0.01	0.15	0	0	0	0	0	0	0	0	0	0	0	0	0	0
92067	0.18	0.05	0.14	5.6	2.81	0.1	0.3	0.09	0.03	0.02	0.42	0.08	0.02	0	0	0	0	0	0	1.12	0.76	0.28	0.09	0.03	0	0.45	0.19	0.06	0.05	0.1	0.05	0.09	0.77	0.15	0.14	0	0	0	0	0	0	0	0	0	0	0	0	0	0
92069	0.18	0.01	0.13	3.66	2.53	0.13	0.05	0.1	0.03	0.03	0.06	0.15	0.01	0	0	0	0	0	0	1.14	0.71	0.33	0.06	0.05	0.01	0.81	0.31	0.14	0.03	0.05	0.03	0.09	0.5	0.14	0.1	0	0	0	0	0	0	0	0	0	0	0	0	0	0
92070	0.09	0.03	0.04	0.48	1.46	0.23	0.38	0.1	0.02	0.17	0	0.01	0	0	0	0	0	0	0	0.98	0.61	0.2	0.08	0.14	0.09	0.82	0.5	0.06	0.02	0.01	0.04	0.02	0.07	0.07	0.07	0	0	0	0	0	0	0	0	0	0	0	0	0	0
92071	0.3	0.25	0.07	4.11	3.14	0.17	1.98	0.06	0.01	0.02	0.18	0.08	0.05	0	0	0	0	0	0	1.18	0.56	3.59	1.69	0.13	0	0.24	0.19	0.02	0.03	0.05	0.07	0.05	0.21	0.29	0.12	0	0	0	0	0	0	0	0	0	0	0	0	0	0
92075	0.19	0.03	0.18	6.41	2.73	0.09	0.37	0.07	0.02	0.01	0.49	0.06	0.03	0	0	0	0	0	0	1.09	0.77	0.3	0.07	0.03	0	0.36	0.15	0.05	0.06	0.15	0.06	0.09	1.13	0.17	0.2	0	0	0	0	0	0	0	0	0	0	0	0	0	0
92078	0.19	0.01	0.14	4.67	2.62	0.11	0.08	0.1	0.03	0.02	0.27	0.19	0.01	0	0	0	0	0	0	1.14	0.73	0.32	0.07	0.04	0	0.69	0.25	0.1	0.04	0.07	0.03	0.1	0.67	0.14	0.11	0	0	0	0	0	0	0	0	0	0	0	0	0	0
92081	0.19	0	0.17	4.77	2.52	0.12	0.05	0.11	0.03	0.02	0.25	0.18	0.01	0	0	0	0	0	0	1.17	0.74	0.35	0.05	0.04	0.01	0.78	0.25	0.13	0.05	0.08	0.03	0.11	0.82	0.16	0.12	0	0	0	0	0	0	0	0	0	0	0	0	0	0
92082	0.13	0.01	0.08	1.41	2.06	0.19	0.14	0.07	0.03	0.07	0	0.05	0	0	0	0	0	0	0	0.99	0.64	0.28	0.04	0.1	0.02	0.9	0.45	0.17	0.02	0.02	0.04	0.04	0.2	0.09	0.08	0	0	0	0	0	0	0	0	0	0	0	0	0	0
92083	0.19	0	0.17	4.54	2.41	0.12	0.04	0.12	0.03	0.02	0.16	0.2	0	0	0	0	0	0	0	1.19	0.72	0.37	0.04	0.04	0.04	0.85	0.28	0.13	0.04	0.07	0.03	0.12	0.79	0.18	0.12	0	0	0	0	0	0	0	0	0	0	0	0	0	0
92084	0.19	0	0.15	3.84	2.44	0.13	0.04	0.11	0.03	0.03	0.07	0.15	0	0	0	0	0	0	0	1.14	0.71	0.36	0.04	0.05	0.02	0.86	0.31	0.16	0.04	0.06	0.03	0.11	0.61	0.15	0.11	0	0	0	0	0	0	0	0	0	0	0	0	0	0
92086	0.08	0.02	0.05	0.29	0.92	0.28	0.29	0.05	0.05	0.21	0.01	0	0	0	0	0	0	0	0	0.72	0.57	0.18	0.03	0.26	0.15	0.95	0.55	0.09	0.02	0.02	0.06	0.02	0.04	0.03	0.14	0	0	0	0	0	0	0	0	0	0	0	0	0	0
92091	0.18	0.04	0.14	5.82	2.78	0.1	0.26	0.09	0.03	0.02	0.42	0.08	0.02	0	0	0	0	0	0	1.11	0.77	0.29	0.08	0.03	0	0.46	0.18	0.06	0.05	0.11	0.05	0.09	0.85	0.15	0.15	0	0	0	0	0	0	0	0	0	0	0	0	0	0
92101	0.2	0.01	0.15	6.4	3.17	1.42	3.87	0.1	0	0	0.16	0.03	0.05	0	0	0	0	0	0	1.2	0.42	0.22	0.23	0.06	0	0.03	0.09	0.02	0.07	0.11	0.11	0.05	0.56	0.3	0.15	0	0	0	0	0	0	0	0	0	0	0	0	0	0
92102	0.17	0.02	0.13	5.7	3.5	1.27	3.65	0.1	0	0.01	0.13	0.02	0.05	0	0	0	0	0	0	1.12	0.41	0.41	0.44	0.12	0	0.03	0.1	0.02	0.05	0.08	0.08	0.04	0.39	0.32	0.13	0	0	0	0	0	0	0	0	0	0	0	0	0	0
92103	0.2	0.02	0.15	6.25	3.24	1.22	3.68	0.1	0	0	0.19	0.03	0.05	0	0	0	0	0	0	1.22	0.44	0.24	0.28	0.07	0	0.04	0.09	0.02	0.06	0.11	0.1	0.05	0.54	0.27	0.14	0	0	0	0	0	0	0	0	0	0	0	0	0	0
92104	0.18	0.03	0.13	5.81	3.44	1.13	3.54	0.1	0	0.01	0.15	0.02	0.05	0	0	0	0	0	0	1.16	0.43	0.35	0.42	0.11	0	0.04	0.1	0.02	0.05	0.09	0.08	0.05	0.42	0.29	0.13	0	0	0	0	0	0	0	0	0	0	0	0	0	0
92105	0.17	0.04	0.12	5.25	3.5	0.97	3.38	0.09	0	0.01	0.15	0.02	0.05	0	0	0	0	0	0	1.12	0.44	0.86	0.61	0.15	0	0.04	0.11	0.02	0.04	0.07	0.07	0.04	0.32	0.33	0.12	0	0	0	0	0	0	0	0	0	0	0	0	0	0
92106	0.19	0	0.19	6.98	2.9	1.66	3.95	0.12	0	0	0.15	0.03	0.06	0	0	0	0	0	0	1.24	0.42	0.2	0.11	0.04	0	0.03	0.08	0.02	0.09	0.13	0.1	0.05	0.72	0.33	0.19	0	0	0	0	0	0	0	0	0	0	0	0	0	0
92107	0.2	0	0.19	7.12	2.91	1.38	3.6	0.12	0	0	0.19	0.03	0.06	0	0	0	0	0	0	1.27	0.44	0.21	0.1	0.03	0	0.04	0.08	0.02	0.09	0.14	0.12	0.05	0.78	0.31	0.18	0	0	0	0	0	0	0	0	0	0	0	0	0	0
92108	0.21	0.04	0.15	5.97	3.23	0.94	3.31	0.1	0	0.01	0.26	0.03	0.06	0	0	0	0	0	0	1.22	0.47	0.33	0.38	0.08	0	0.05	0.1	0.02	0.05	0.1	0.08	0.05	0.5	0.27	0.14	0	0	0	0	0	0	0	0	0	0	0	0	0	0
92109	0.23	0.02	0.17	6.98	2.98	0.86	2.82	0.1	0	0	0.27	0.03	0.06	0	0	0	0	0	0	1.28	0.51	0.25	0.13	0.04	0	0.06	0.09	0.02	0.07	0.14	0.08	0.06	0.83	0.26	0.17	0	0	0	0	0	0	0	0	0	0	0	0	0	0
92110	0.22	0.02	0.16	6.51	3.08	0.96	3.15	0.1	0	0	0.26	0.03	0.06	0	0	0	0	0	0	1.25	0.47	0.23	0.2	0.05	0	0.05	0.09	0.02	0.06	0.12	0.08	0.05	0.66	0.26	0.16	0	0	0	0	0	0	0	0	0	0	0	0	0	0
92111	0.22	0.07	0.15	6.12	3.14	0.67	2.68	0.08	0	0.01	0.3	0.03	0.06	0	0	0	0	0	0	1.27	0.51	0.25	0.28	0.06	0	0.09	0.1	0.02	0.05	0.11	0.08	0.06	0.58	0.25	0.15	0	0	0	0	0	0	0	0	0	0	0	0	0	0
92113	0.19	0.01	0.15	6.06	3.46	1.44	3.84	0.1	0	0	0.13	0.02	0.05	0	0	0	0	0	0	1.13	0.4	0.25	0.32	0.09	0	0.03	0.09	0.02	0.05	0.09	0.08	0.05	0.45	0.3	0.14	0	0	0	0	0	0	0	0	0	0	0	0	0	0
92114	0.16	0.03	0.11	5	3.53	1.03	3.47	0.09	0	0.01	0.13	0.03	0.05	0	0	0	0	0	0	1.06	0.4	0.84	0.63	0.19	0	0.03	0.1	0.02	0.03	0.07	0.07	0.04	0.26	0.34	0.11	0	0	0	0	0	0	0	0	0	0	0	0	0	0
92115	0.17	0.05	0.11	5.06	3.44	0.8	3.32	0.09	0	0.01	0.17	0.03	0.05	0	0	0	0	0	0	1.14	0.45	1.68	0.78	0.17	0	0.06	0.11	0.02	0.04	0.07	0.07	0.04	0.3	0.32	0.11	0	0	0	0	0	0	0	0	0	0	0	0	0	0
92116	0.21	0.04	0.13	5.75	3.35	0.93	3.27	0.1	0	0.01	0.21	0.03	0.05	0	0	0	0	0	0	1.19	0.46	0.41	0.46	0.1	0	0.05	0.1	0.02	0.05	0.09	0.08	0.05	0.43	0.29	0.13	0	0	0	0	0	0	0	0	0	0	0	0	0	0
92117	0.22	0.05	0.16	6.48	3.06	0.62	2.42	0.08	0	0.01	0.3	0.03	0.06	0	0	0	0	0	0	1.25	0.52	0.24	0.2	0.05	0	0.1	0.1	0.02	0.06	0.13	0.08	0.06	0.73	0.23	0.17	0	0	0	0	0	0	0	0	0	0	0	0	0	0
92118	0.17	0	0.15	6.33	3.27	1.81	4.17	0.11	0.01	0	0.09	0.03	0.06	0	0	0	0	0	0	1.06	0.35	0.16	0.16	0.06	0	0.03	0.08	0.02	0.06	0.1	0.08	0.05	0.48	0.37	0.17	0	0	0	0	0	0	0	0	0	0	0	0	0	0
92119	0.16	0.12	0.09	4.51	3.27	0.38	2.85	0.08	0	0.02	0.21	0.05	0.05	0	0	0	0	0	0	1.17	0.5	12.13	5.02	0.18	0	0.13	0.16	0.02	0.04	0.06	0.07	0.04	0.22	0.32	0.1	0	0	0	0	0	0	0	0	0	0	0	0	0	0
92120	0.19	0.09	0.11	5.09	3.34	0.59	3.01	0.09	0	0.02	0.22	0.03	0.05	0	0	0	0	0	0	1.22	0.49	2.78	1.19	0.14	0	0.09	0.13	0.02	0.04	0.07	0.07	0.05	0.3	0.3	0.12	0	0	0	0	0	0	0	0	0	0	0	0	0	0
92121	0.23	0.13	0.15	6.28	3.03	0.14	1.49	0.06	0.01	0.01	0.31	0.02	0.05	0	0	0	0	0	0	1.25	0.63	0.25	0.16	0.04	0	0.22	0.13	0.03	0.06	0.12	0.08	0.07	0.8	0.19	0.18	0	0	0	0	0	0	0	0	0	0	0	0	0	0
92122	0.23	0.06	0.16	6.71	2.99	0.4	2.02	0.07	0.01	0.01	0.3	0.03	0.06	0	0	0	0	0	0	1.25	0.57	0.25	0.14	0.04	0	0.14	0.1	0.02	0.06	0.14	0.07	0.07	0.89	0.2	0.18	0	0	0	0	0	0	0	0	0	0	0	0	0	0
92123	0.21	0.08	0.14	5.81	3.24	0.7	2.86	0.09	0	0.01	0.31	0.03	0.06	0	0	0	0	0	0	1.26	0.5	0.34	0.43	0.08	0	0.08	0.11	0.02	0.05	0.1	0.08	0.05	0.47	0.28	0.14	0	0	0	0	0	0	0	0	0	0	0	0	0	0
92124	0.22	0.13	0.12	5.28	3.26	0.43	2.68	0.08	0.01	0.02	0.3	0.03	0.06	0	0	0	0	0	0	1.26	0.53	0.57	0.69	0.1	0	0.13	0.14	0.02	0.04	0.08	0.07	0.05	0.36	0.28	0.14	0	0	0	0	0	0	0	0	0	0	0	0	0	0
92126	0.32	0.35	0.12	5.59	3.09	0.12	1.33	0.05	0.01	0.02	0.3	0.03	0.04	0	0	0	0	0	0	1.24	0.62	0.2	0.23	0.05	0	0.26	0.16	0.03	0.05	0.09	0.08	0.07	0.54	0.19	0.17	0	0	0	0	0	0	0	0	0	0	0	0	0	0
92127	0.25	0.13	0.1	4.58	2.84	0.11	0.36	0.08	0.03	0.02	0.13	0.13	0.02	0	0	0	0	0	0	1.12	0.72	0.21	0.14	0.04	0	0.51	0.23	0.06	0.04	0.07	0.05	0.08	0.46	0.14	0.1	0	0	0	0	0	0	0	0	0	0	0	0	0	0
92128	0.71	0.87	0.09	4.32	2.94	0.11	0.72	0.06	0.02	0.02	0.1	0.1	0.03	0	0	0	0	0	0	1.17	0.69	0.28	0.21	0.05	0	0.45	0.23	0.05	0.04	0.06	0.06	0.07	0.33	0.16	0.11	0	0	0	0	0	0	0	0	0	0	0	0	0	0
92129	0.61	0.44	0.11	5.14	3.03	0.11	0.82	0.05	0.02	0.02	0.23	0.05	0.03	0	0	0	0	0	0	1.18	0.68	0.2	0.18	0.04	0	0.36	0.19	0.04	0.04	0.09	0.06	0.08	0.52	0.17	0.15	0	0	0	0	0	0	0	0	0	0	0	0	0	0
92130	0.24	0.11	0.14	6.13	2.96	0.1	0.73	0.06	0.01	0.01	0.36	0.05	0.03	0	0	0	0	0	0	1.14	0.69	0.26	0.12	0.03	0	0.3	0.15	0.04	0.06	0.12	0.07	0.08	0.83	0.17	0.19	0	0	0	0	0	0	0	0	0	0	0	0	0	0
92131	0.37	0.55	0.09	4.91	3.08	0.12	1.49	0.05	0.01	0.02	0.26	0.06	0.04	0	0	0	0	0	0	1.23	0.62	0.32	0.35	0.07	0	0.27	0.18	0.03	0.04	0.07	0.08	0.07	0.35	0.23	0.15	0	0	0	0	0	0	0	0	0	0	0	0	0	0
92135	0.18	0	0.17	6.66	3.01	1.69	4.05	0.11	0	0	0.15	0.03	0.06	0	0	0	0	0	0	1.19	0.4	0.19	0.14	0.05	0	0.03	0.08	0.02	0.08	0.12	0.08	0.05	0.62	0.33	0.17	0	0	0	0	0	0	0	0	0	0	0	0	0	0
92136	0.18	0.01	0.13	5.9	3.56	1.51	3.82	0.1	0	0	0.12	0.02	0.05	0	0	0	0	0	0	1.09	0.37	0.24	0.34	0.11	0	0.03	0.09	0.02	0.05	0.09	0.07	0.04	0.4	0.32	0.14	0	0	0	0	0	0	0	0	0	0	0	0	0	0
92139	0.15	0.02	0.11	4.95	3.52	1.13	3.29	0.09	0	0.01	0.11	0.03	0.05	0	0	0	0	0	0	1.03	0.37	0.59	0.57	0.2	0	0.03	0.09	0.02	0.04	0.06	0.06	0.04	0.24	0.36	0.11	0	0	0	0	0	0	0	0	0	0	0	0	0	0
92140	0.21	0.01	0.17	6.56	3.06	1.25	3.5	0.1	0	0	0.19	0.03	0.06	0	0	0	0	0	0	1.25	0.45	0.22	0.19	0.05	0	0.04	0.1	0.02	0.07	0.12	0.12	0.05	0.63	0.29	0.15	0	0	0	0	0	0	0	0	0	0	0	0	0	0
92145	0.24	0.21	0.12	5.43	3.13	0.25	2.07	0.06	0.01	0.02	0.31	0.04	0.05	0	0	0	0	0	0	1.27	0.57	0.35	0.44	0.08	0	0.2	0.15	0.02	0.04	0.09	0.08	0.06	0.43	0.25	0.16	0	0	0	0	0	0	0	0	0	0	0	0	0	0
92154	0.13	0	0.1	4.68	3.39	1.2	2.52	0.08	0.01	0.01	0.07	0.04	0.07	0	0	0	0	0	0	0.83	0.28	0.12	0.21	0.1	0	0.02	0.08	0.02	0.04	0.06	0.05	0.03	0.19	0.42	0.14	0	0	0	0	0	0	0	0	0	0	0	0	0	0
92173	0.13	0	0.11	5.17	3.42	1.45	2.72	0.08	0.01	0	0.06	0.03	0.09	0	0	0	0	0	0	0.85	0.27	0.11	0.13	0.06	0	0.02	0.06	0.02	0.05	0.06	0.05	0.04	0.21	0.45	0.16	0	0	0	0	0	0	0	0	0	0	0	0	0	0
92672	0.2	0.01	0.31	5.85	1.45	0.2	0.1	0.16	0.02	0.01	0.08	0.08	0.01	0	0	0	0	0	0	1.06	0.83	0.56	0.14	0.12	0.13	0.95	0.17	0.8	0.17	0.18	0.04	0.22	1.2	0.32	0.21	0	0	0	0	0	0	0	0	0	0	0	0	0	0
[truncated: 125 more columns]
